# Supplementary material
Source: PubMed Central journal article supplement (PMC6423962)

**Supporting Information Table 1.** Enhancers of oligodendrocyte formation identified by screening of a 3,000-molecule bioactives library

| Name                                                    | Total Cells | % Oligos | MW     | DMSO% oligos_Mean | DMSO% oligos_StdDev | cell viability (% relative to DMSO) | fold-change in % MBP+ oligodendrocytes |
|---------------------------------------------------------|-------------|----------|--------|-------------------|---------------------|-------------------------------------|----------------------------------------|
| Isoconazole nitrate                                     | 584         | 53.25    | 479.14 | 7.95              | 3.66                | 106.98                              | <b>6.70</b>                            |
| EPZ005687                                               | 610         | 50.00    | 539.67 | 8.47              | 2.61                | 91.36                               | <b>5.90</b>                            |
| Clotrimazole                                            | 666         | 27.93    | 344.85 | 4.75              | 2.75                | 122.50                              | <b>5.88</b>                            |
| Ketoconazole                                            | 847         | 52.77    | 531.44 | 9.33              | 3.87                | 121.51                              | <b>5.65</b>                            |
| Butoconazole nitrate                                    | 809         | 46.85    | 474.79 | 8.92              | 2.63                | 122.03                              | <b>5.25</b>                            |
| Sertaconazole nitrate                                   | 777         | 39.38    | 500.78 | 7.52              | 1.87                | 134.49                              | <b>5.23</b>                            |
| Pyrimethamine                                           | 604         | 43.87    | 248.71 | 8.92              | 2.63                | 91.11                               | <b>4.92</b>                            |
| Ifenprodil Tartrate                                     | 693         | 41.41    | 475.53 | 8.47              | 2.61                | 103.79                              | <b>4.89</b>                            |
| Varenicline tartrate                                    | 783         | 22.86    | 361.36 | 4.75              | 2.75                | 144.02                              | <b>4.81</b>                            |
| Raloxifene HCl                                          | 777         | 35.01    | 510.04 | 7.29              | 3.37                | 114.37                              | <b>4.80</b>                            |
| Hydroxyzine 2HCl                                        | 896         | 40.63    | 447.83 | 8.47              | 2.61                | 134.19                              | <b>4.80</b>                            |
| Ziprasidone HCl                                         | 1003        | 34.10    | 449.40 | 7.29              | 3.37                | 147.64                              | <b>4.68</b>                            |
| Bifonazole                                              | 820         | 40.98    | 310.39 | 8.92              | 2.63                | 123.69                              | <b>4.59</b>                            |
| SB408124                                                | 704         | 39.63    | 356.37 | 8.92              | 2.63                | 106.19                              | <b>4.44</b>                            |
| Sulconazole Nitrate                                     | 700         | 37.57    | 460.76 | 8.47              | 2.61                | 104.84                              | <b>4.44</b>                            |
| Pentamidine isethionate                                 | 758         | 41.29    | 592.69 | 9.33              | 3.87                | 108.75                              | <b>4.42</b>                            |
| Clemastine fumarate                                     | 449         | 20.49    | 459.97 | 4.75              | 2.75                | 82.59                               | <b>4.31</b>                            |
| Raltegravir (MK-0518)                                   | 768         | 38.02    | 444.42 | 8.92              | 2.63                | 115.85                              | <b>4.26</b>                            |
| Fenticonazole Nitrate                                   | 687         | 35.66    | 518.41 | 8.92              | 2.63                | 103.63                              | <b>4.00</b>                            |
| Mubritinib (TAK 165)                                    | 779         | 31.45    | 468.47 | 7.95              | 3.66                | 142.71                              | <b>3.95</b>                            |
| Pramoxine HCl                                           | 755         | 32.98    | 329.86 | 8.47              | 2.61                | 113.08                              | <b>3.89</b>                            |
| TMB-8 hydrochloride                                     | 758         | 18.47    | 432.00 | 4.75              | 2.75                | 139.42                              | <b>3.89</b>                            |
| (±)-Vesamicol hydrochloride                             | 821         | 34.23    | 295.86 | 8.84              | 3.16                | 112.02                              | <b>3.87</b>                            |
| Clotrimazole                                            | 748         | 34.36    | 344.84 | 8.92              | 2.63                | 112.83                              | <b>3.85</b>                            |
| Fulvestrant                                             | 758         | 18.21    | 606.79 | 4.75              | 2.75                | 139.42                              | <b>3.83</b>                            |
| Raloxifene hydrochloride                                | 924         | 33.33    | 510.06 | 8.84              | 3.16                | 126.07                              | <b>3.77</b>                            |
| Praziquantel                                            | 728         | 33.24    | 312.41 | 8.92              | 2.63                | 109.81                              | <b>3.72</b>                            |
| Ziprasidone hydrochloride monohydrate                   | 851         | 32.78    | 467.42 | 8.84              | 3.16                | 116.11                              | <b>3.71</b>                            |
| LY2784544                                               | 480         | 28.75    | 469.94 | 7.95              | 3.66                | 87.93                               | <b>3.62</b>                            |
| Ifenprodil tartrate                                     | 739         | 33.69    | 801.00 | 9.33              | 3.87                | 106.02                              | <b>3.61</b>                            |
| L-745,870 hydrochloride                                 | 647         | 32.61    | 363.29 | 9.33              | 3.87                | 92.82                               | <b>3.49</b>                            |
| Hexahydro-sila-difenidol hydrochloride, p-fluoro analog | 654         | 26.76    | 386.03 | 7.68              | 3.55                | 95.08                               | <b>3.49</b>                            |

**KEY**

Imidazole antifungal

Enhances oligodendrocyte formation and causes sterol intermediate accumulation

False positive (did not confirm as enhancing oligodendrocyte formation)

not retested

**Supporting Information Table 2.** Purity of compounds estimated using liquid chromatography-mass spectrometry (LC-MS). Dashed line indicates solvent front.

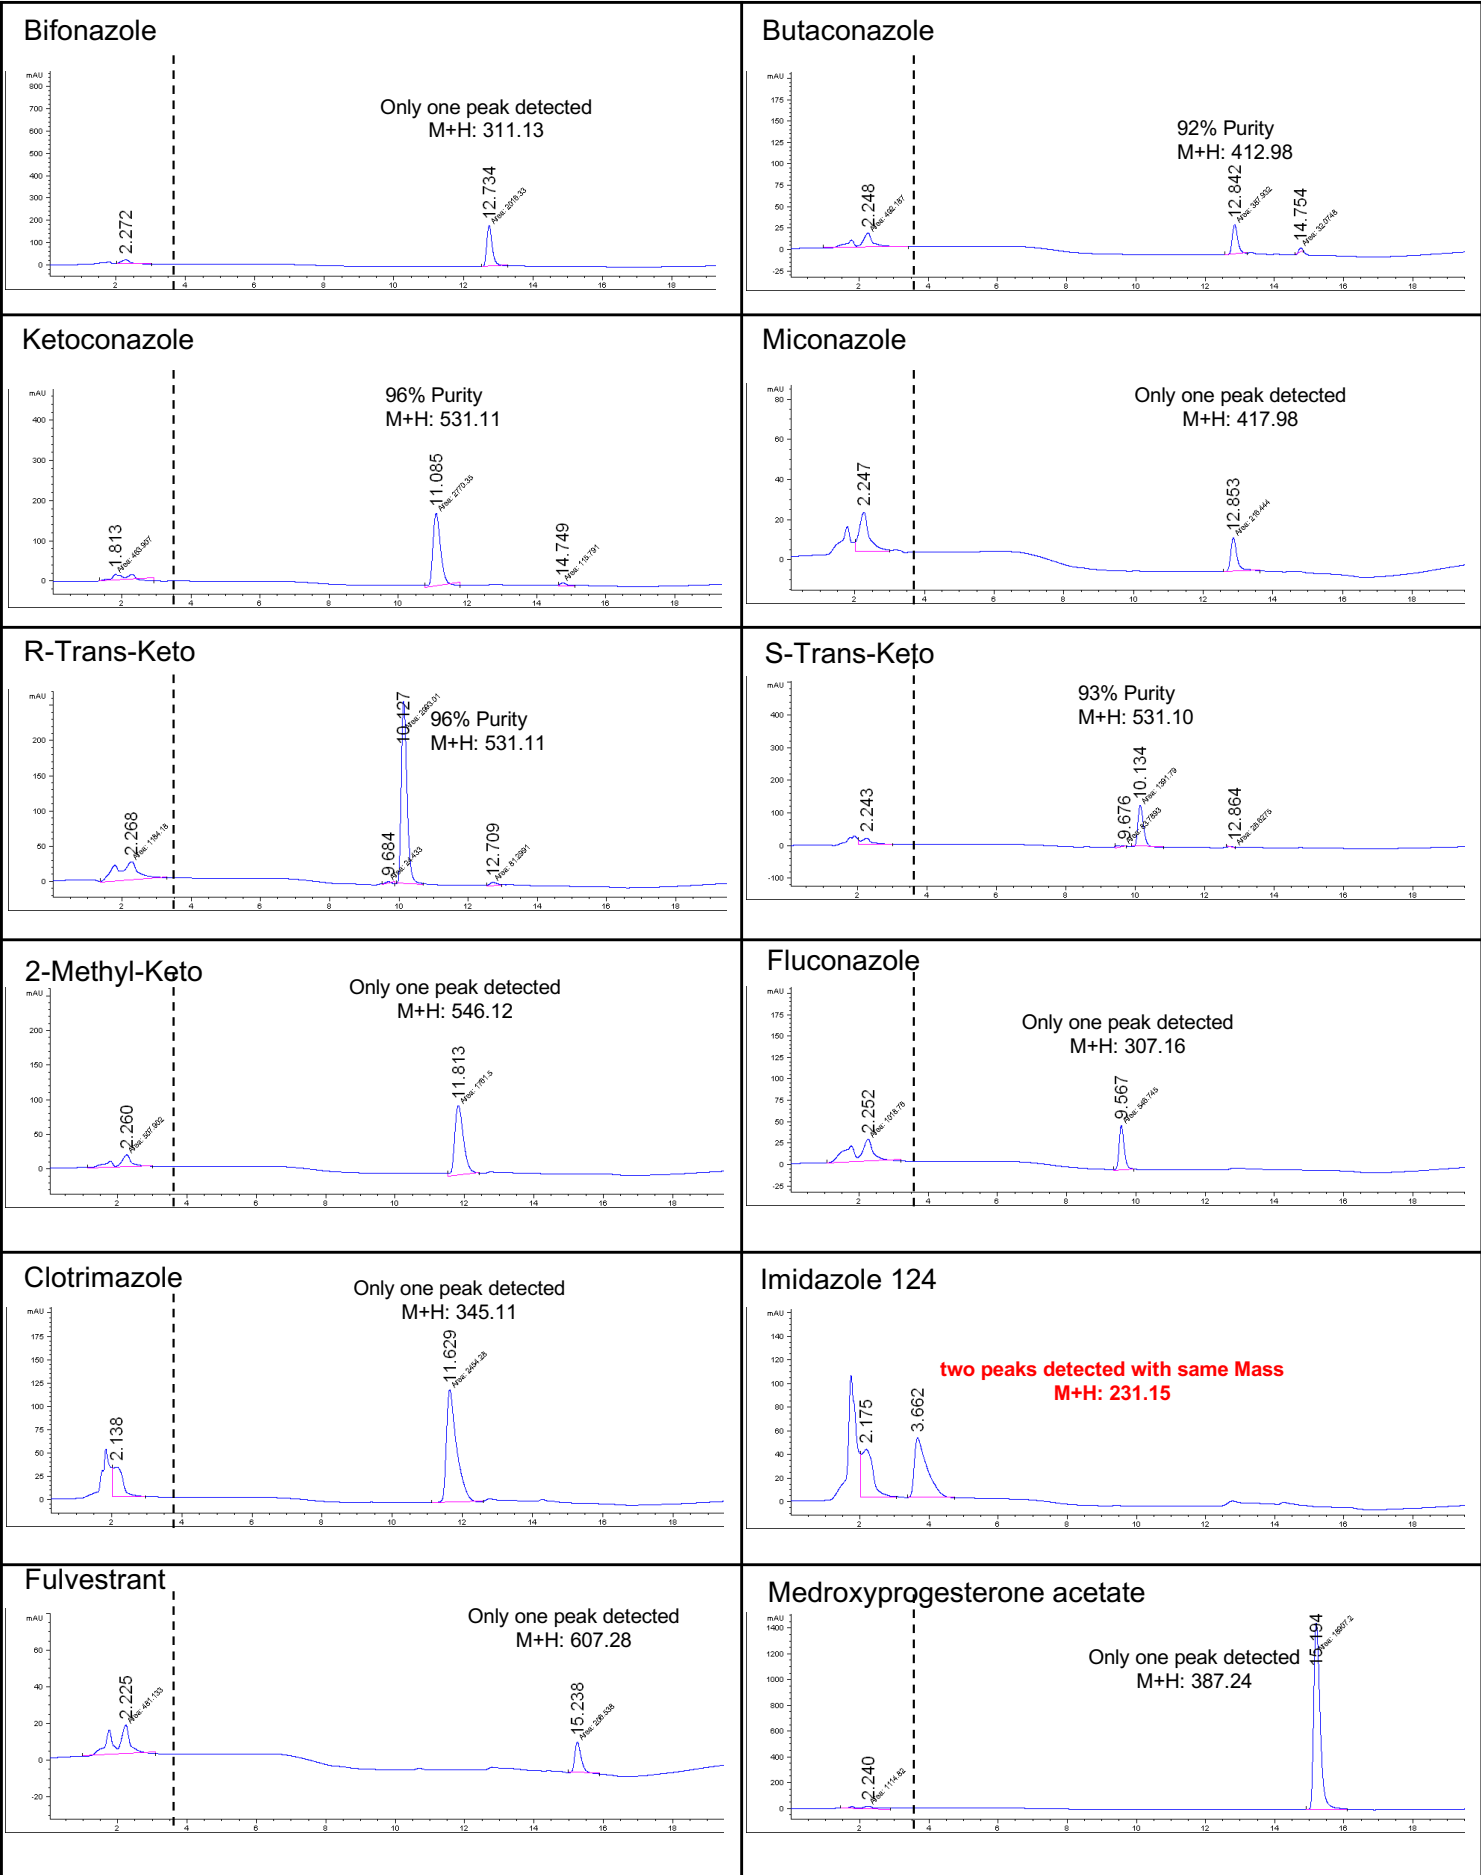

**Supporting Information Table 2, continued.** Purity of compounds estimated using liquid chromatography-mass spectrometry (LC-MS).

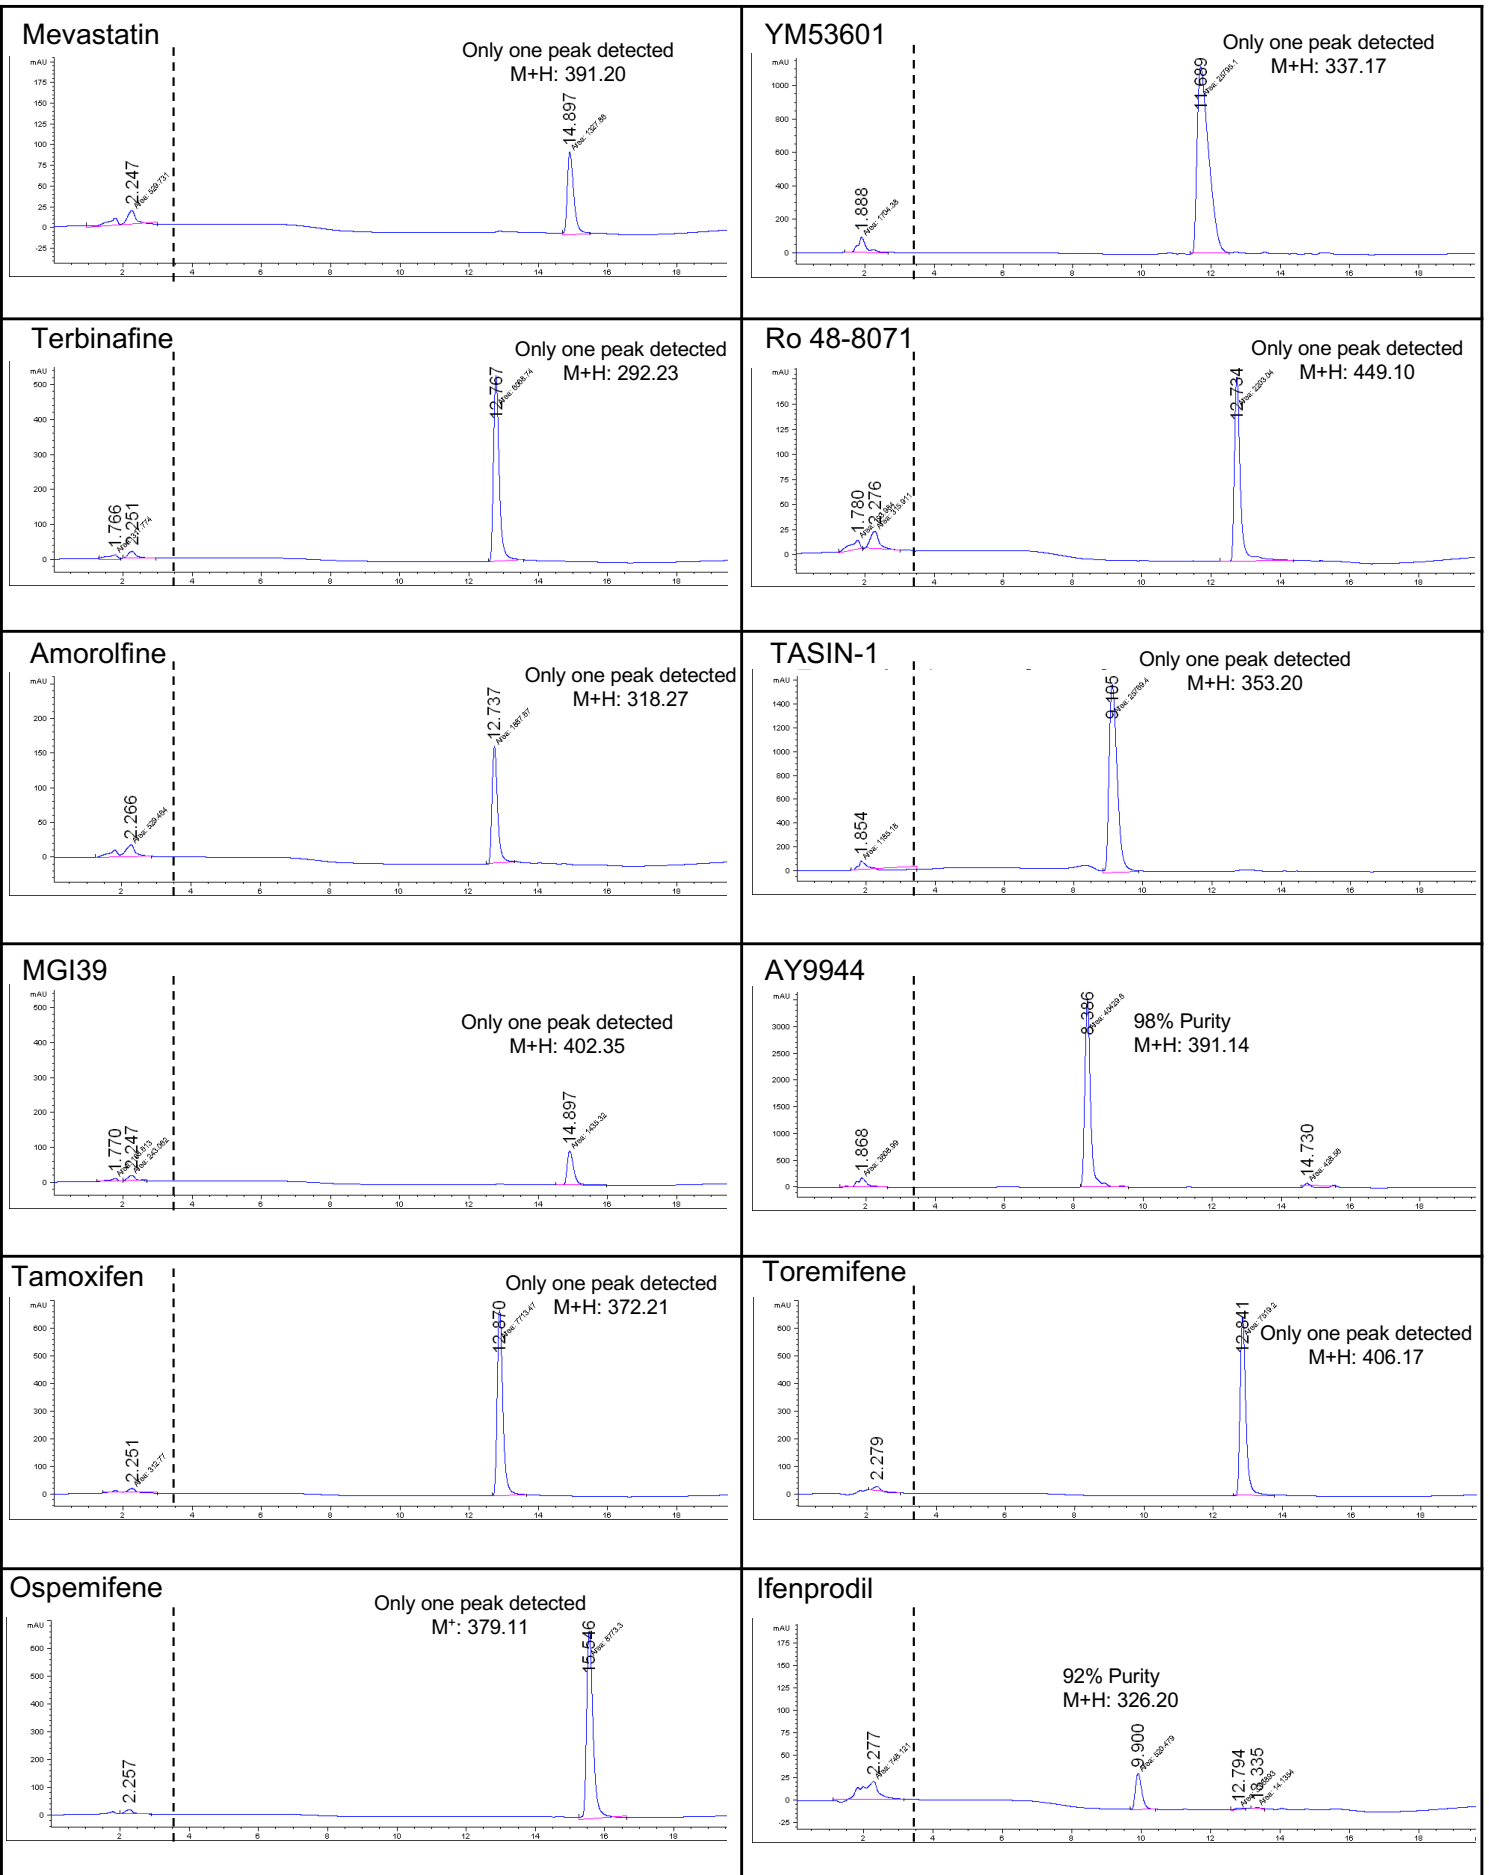

**Supporting Information Table 2, continued.** Purity of compounds estimated using liquid chromatography-mass spectrometry (LC-MS).

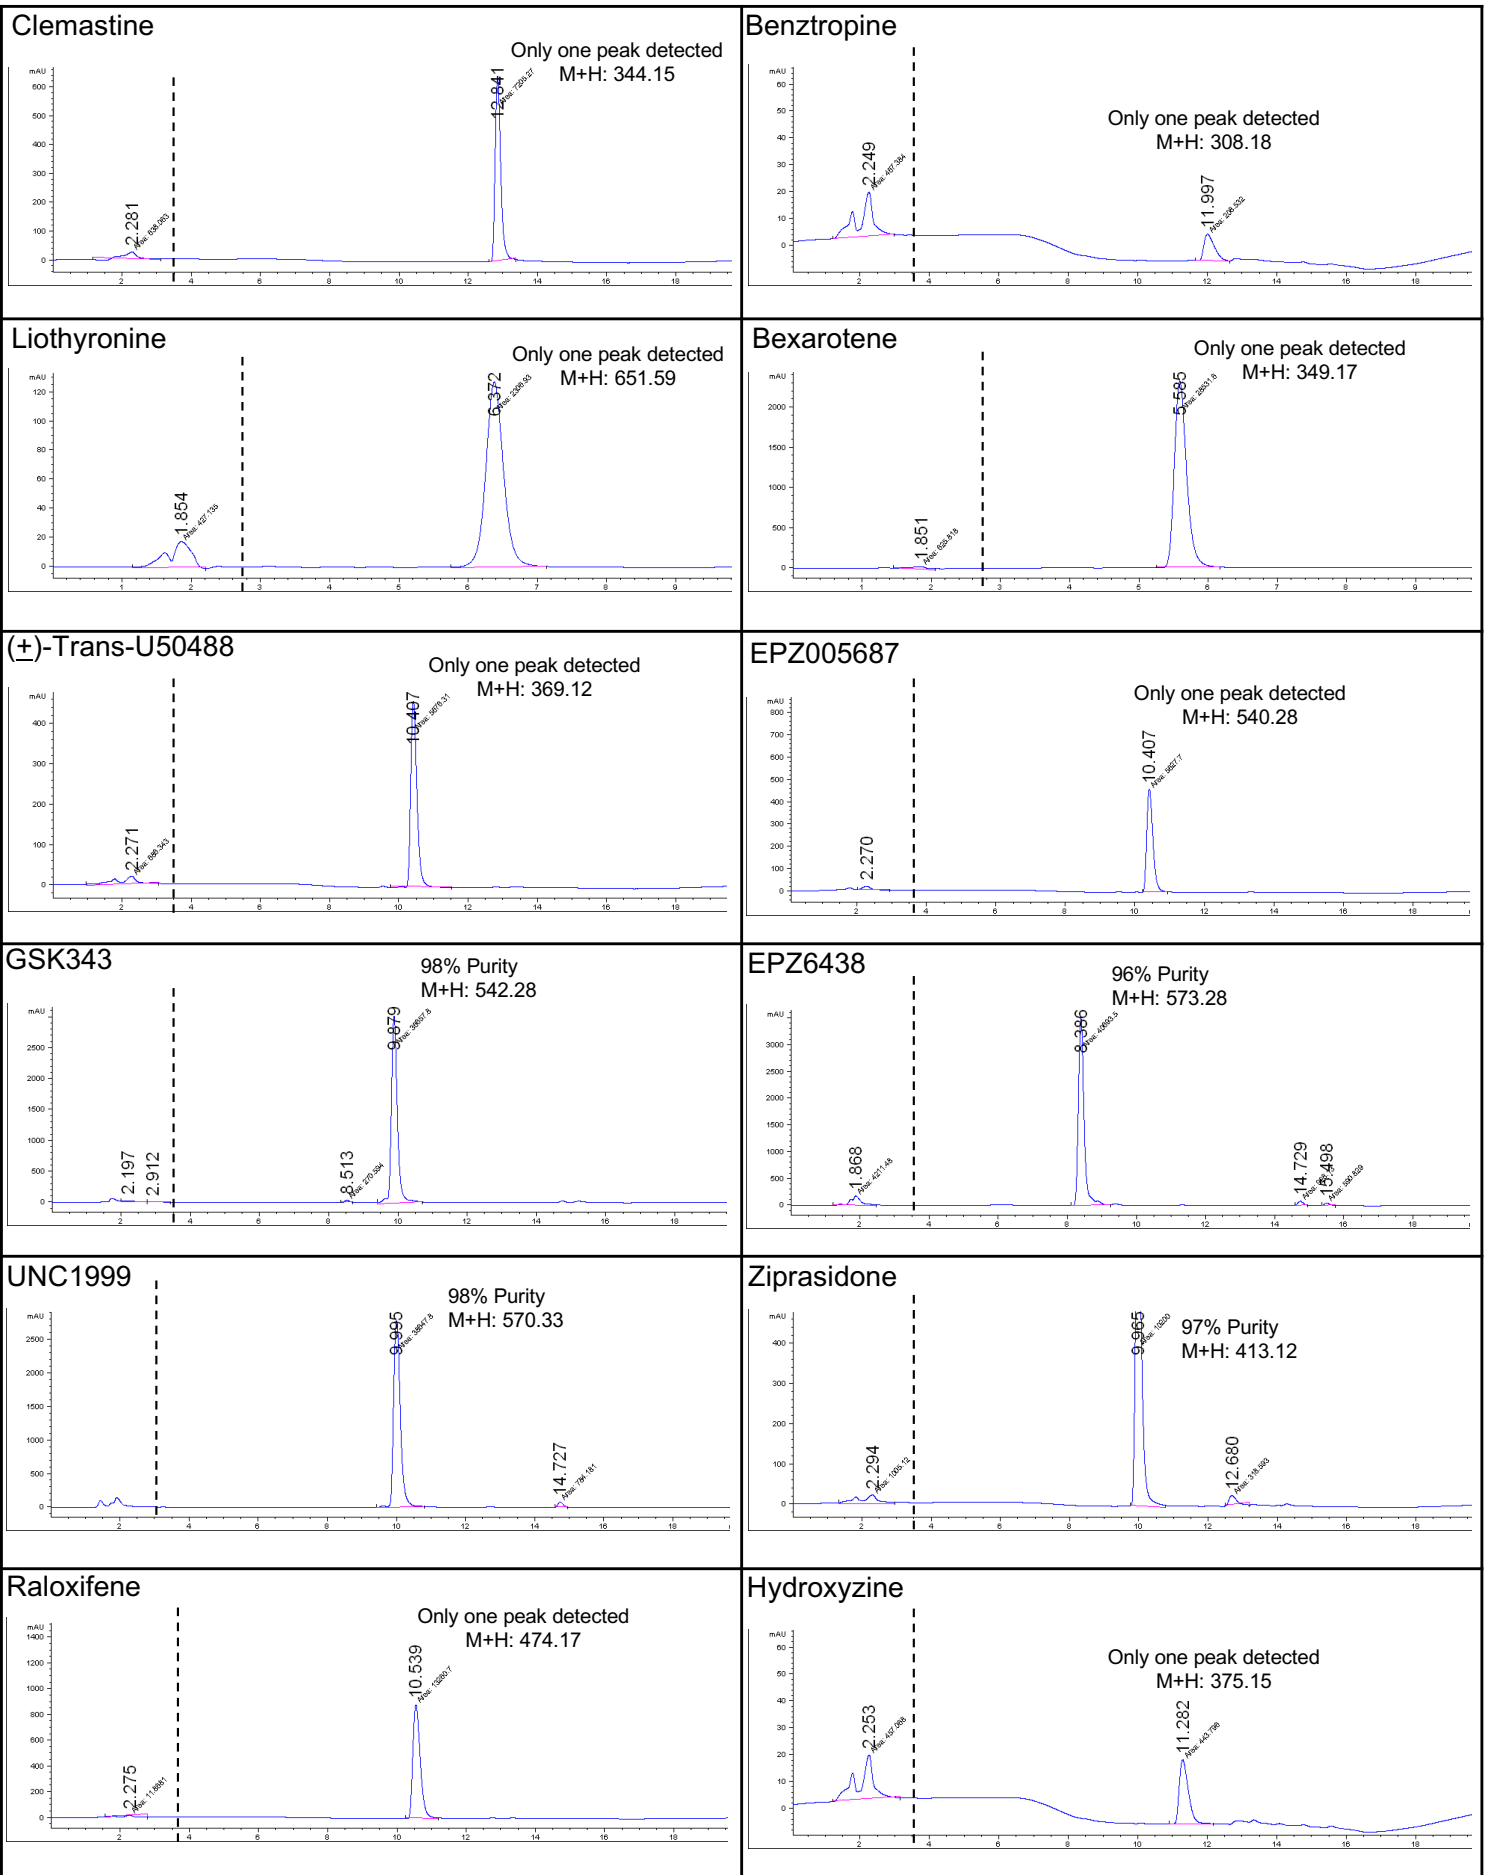

**Supporting Information Table 2, continued.** Purity of compounds estimated using liquid chromatography-mass spectrometry (LC-MS).

**Sigma H127**

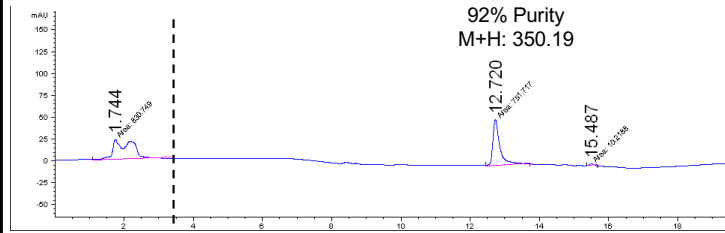

**Vesamicol**

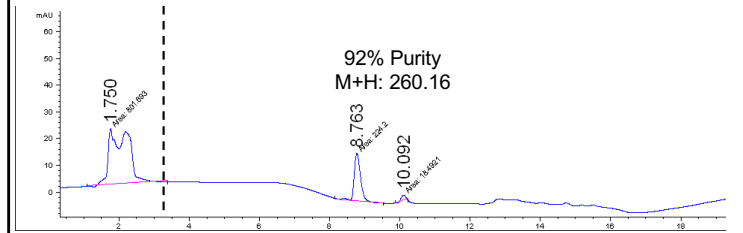

**Pramoxine**

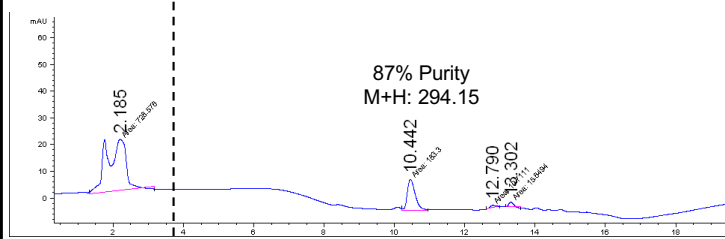

**L 745, 870**

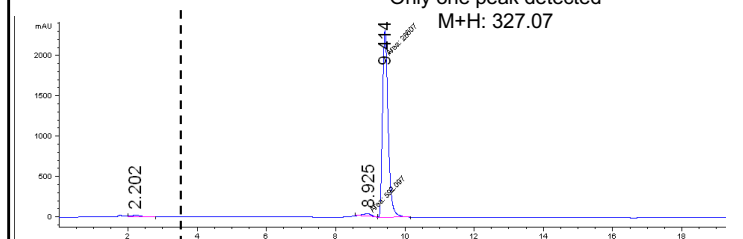

**TMB-8**

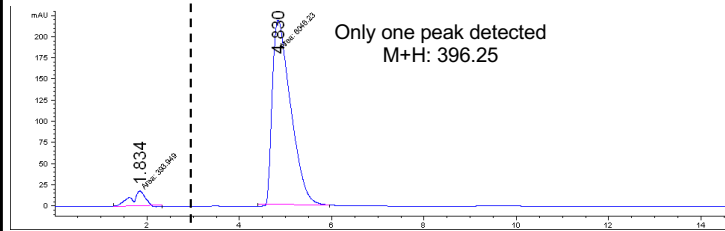

**Abiraterone acetate**

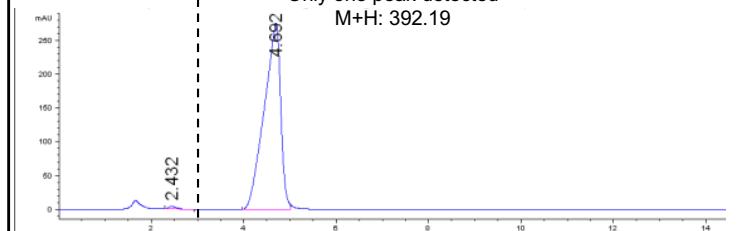

**Varespladib**

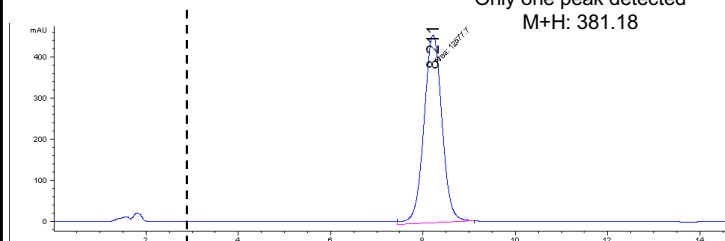

**Medroxyprogesterone acetate**

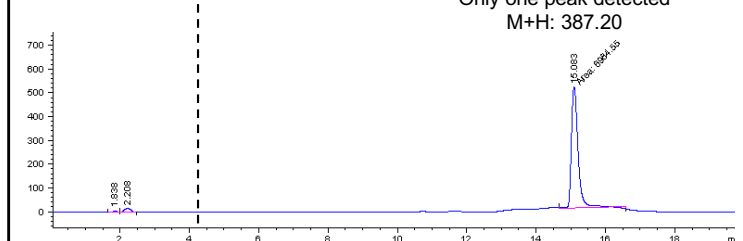

**4-Hydroxytamoxifen**

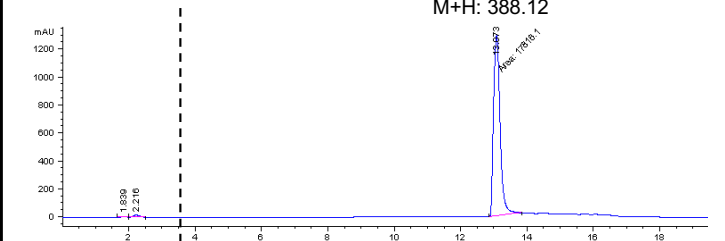

**TASIN-449**

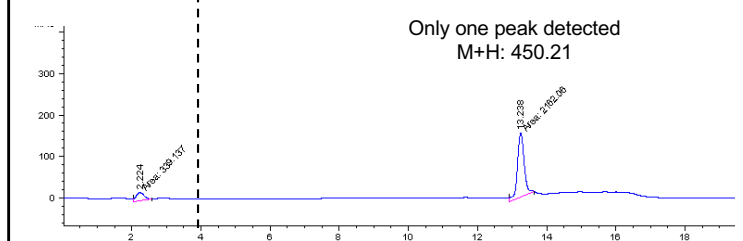

**2-Methyl-ketoconazole**

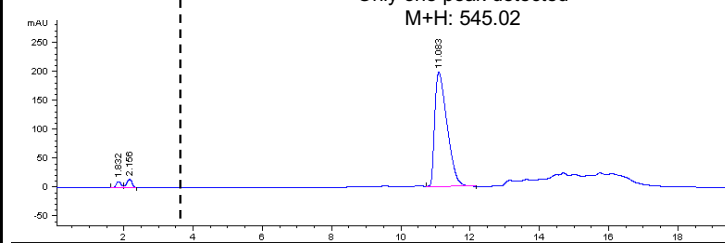

**Lanosterol**

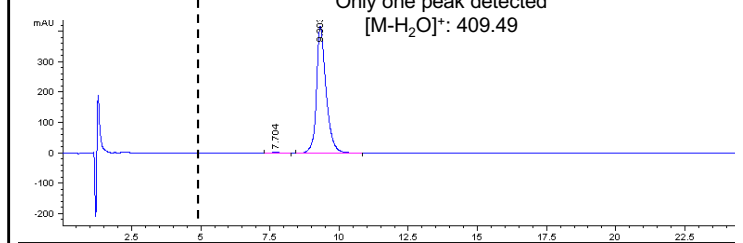

**Supporting Information Table 2, continued.** Purity of compounds estimated using liquid chromatography-mass spectrometry (LC-MS).

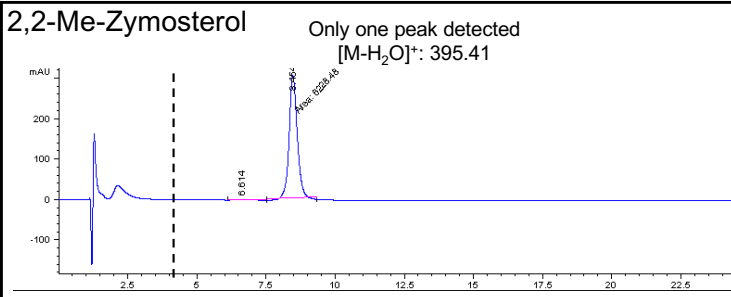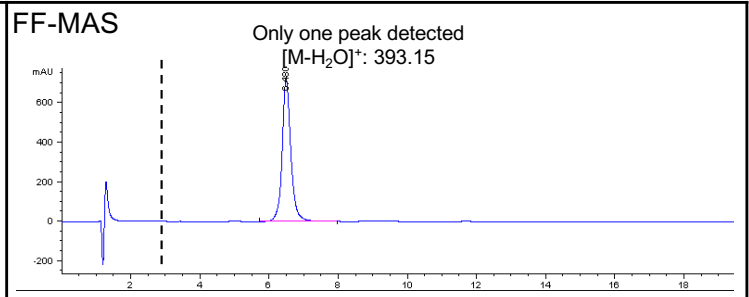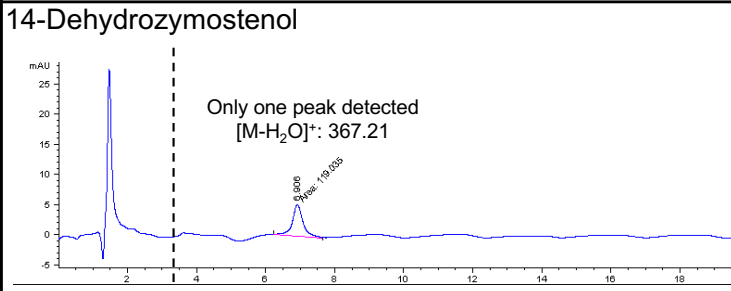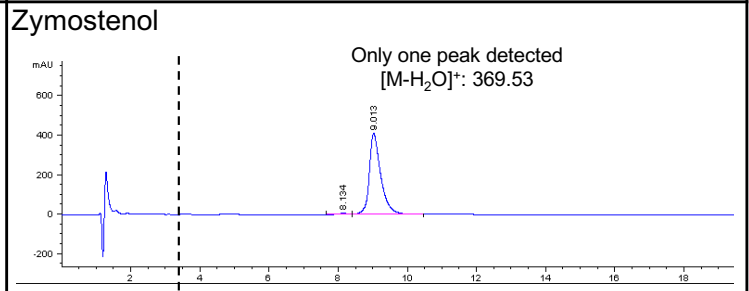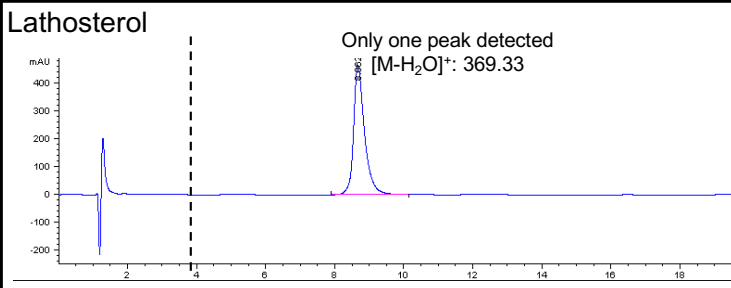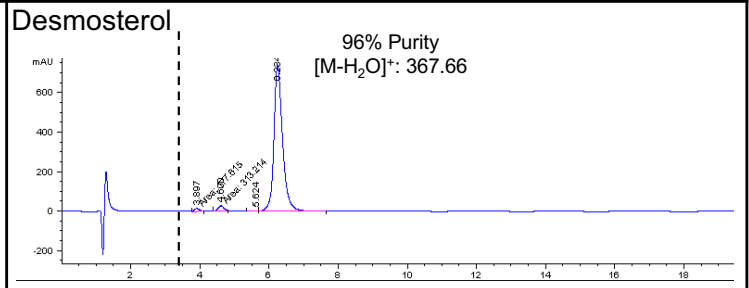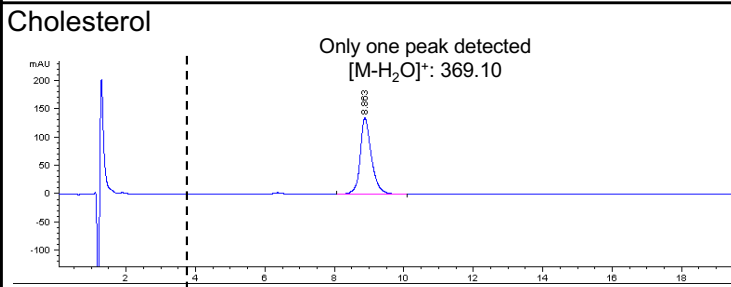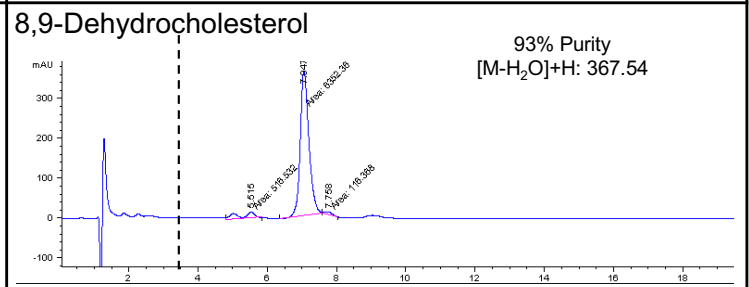

**Supporting Table 3. NMR data for 2,2-dimethyl-5 $\alpha$ -cholesta-8,24-dien-3 $\beta$ -ol (2,2-Dimethylzymosterol, or 2,2-Me-zymosterol):**

$^1\text{H}$  NMR (400 MHz,  $\text{CDCl}_3$ )  $\delta$ : 5.09 (t,  $J = 7.0$  Hz, 1H), 3.38 (s, 1H), 2.17 (dd,  $J = 16.3, 6.9$  Hz, 1H), 2.12 – 1.93 (m, 6H), 1.86 (tt,  $J = 9.8, 8.3$  Hz, 2H), 1.68 (s, 3H), 1.63 – 1.36 (m, 13H), 1.33 (d,  $J = 11.2$  Hz, 1H), 1.31 – 1.09 (m, 5H), 1.05 (s, 3H), 1.00 (s, 3H), 0.98 – 0.91 (m, 6H), 0.60 (s, 3H).  $^{13}\text{C}$  NMR (101 MHz,  $\text{CDCl}_3$ )  $\delta$ : 137.3, 130.9, 126.7, 125.2, 79.1, 76.7, 54.8, 51.7, 50.7, 42.5, 42.2, 37.0, 36.7, 36.1, 36.0, 35.0, 31.6, 28.7, 27.1, 25.7, 24.8, 24.8, 23.7, 23.0, 21.7, 21.4, 18.7, 17.6, 11.2. MS (ESI, +Ve) for  $[\text{C}_{29}\text{H}_{49}\text{O}+\text{H}]^+$  Calcd., 413.4, found 413.6.

# <sup>1</sup>H NMR of 2,2-Me-Zymosterol

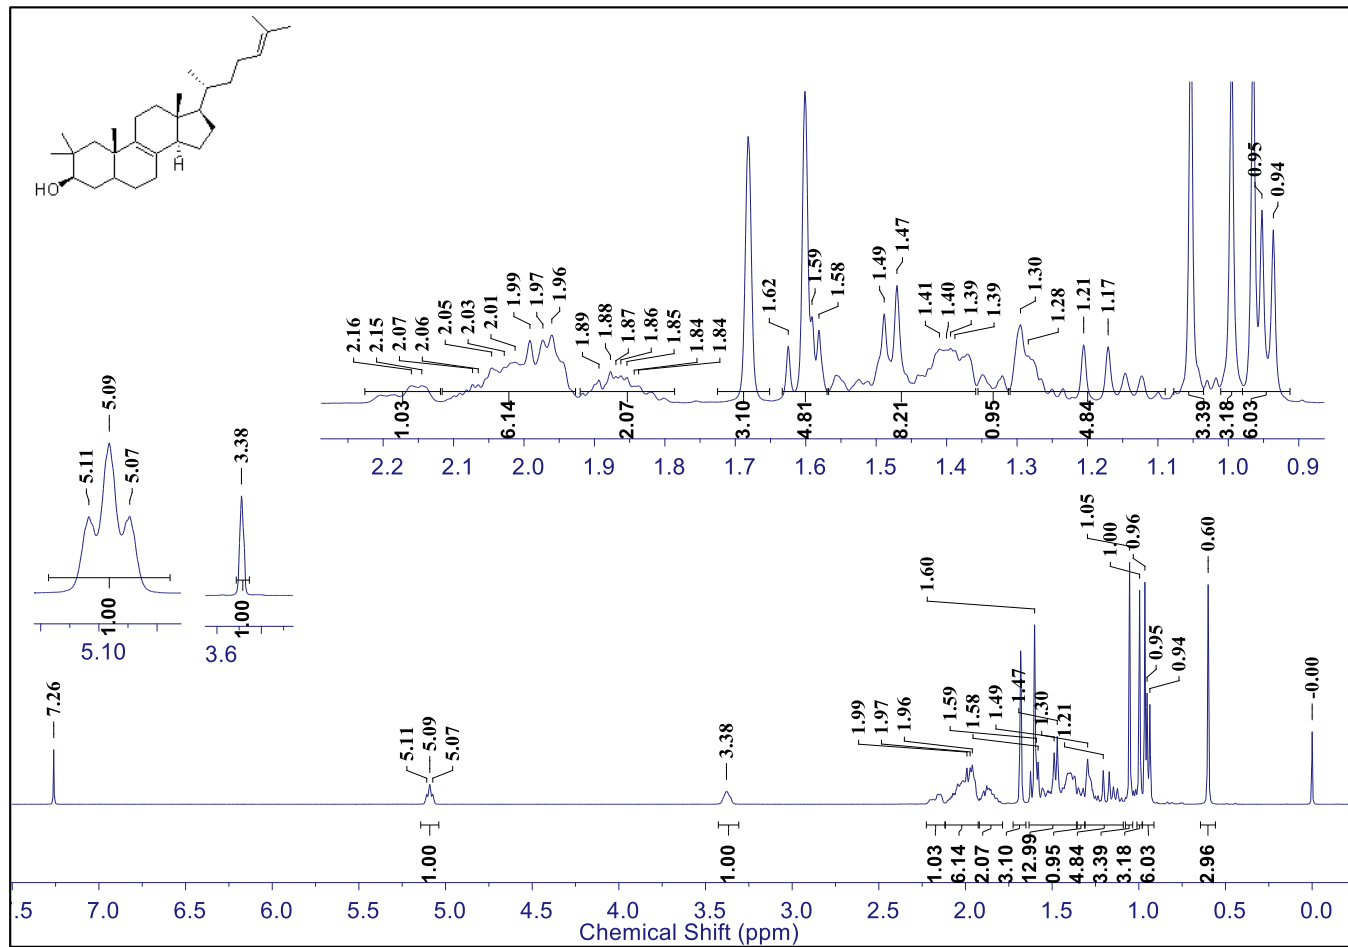

# <sup>13</sup>C NMR of 2,2-Me-Zymosterol

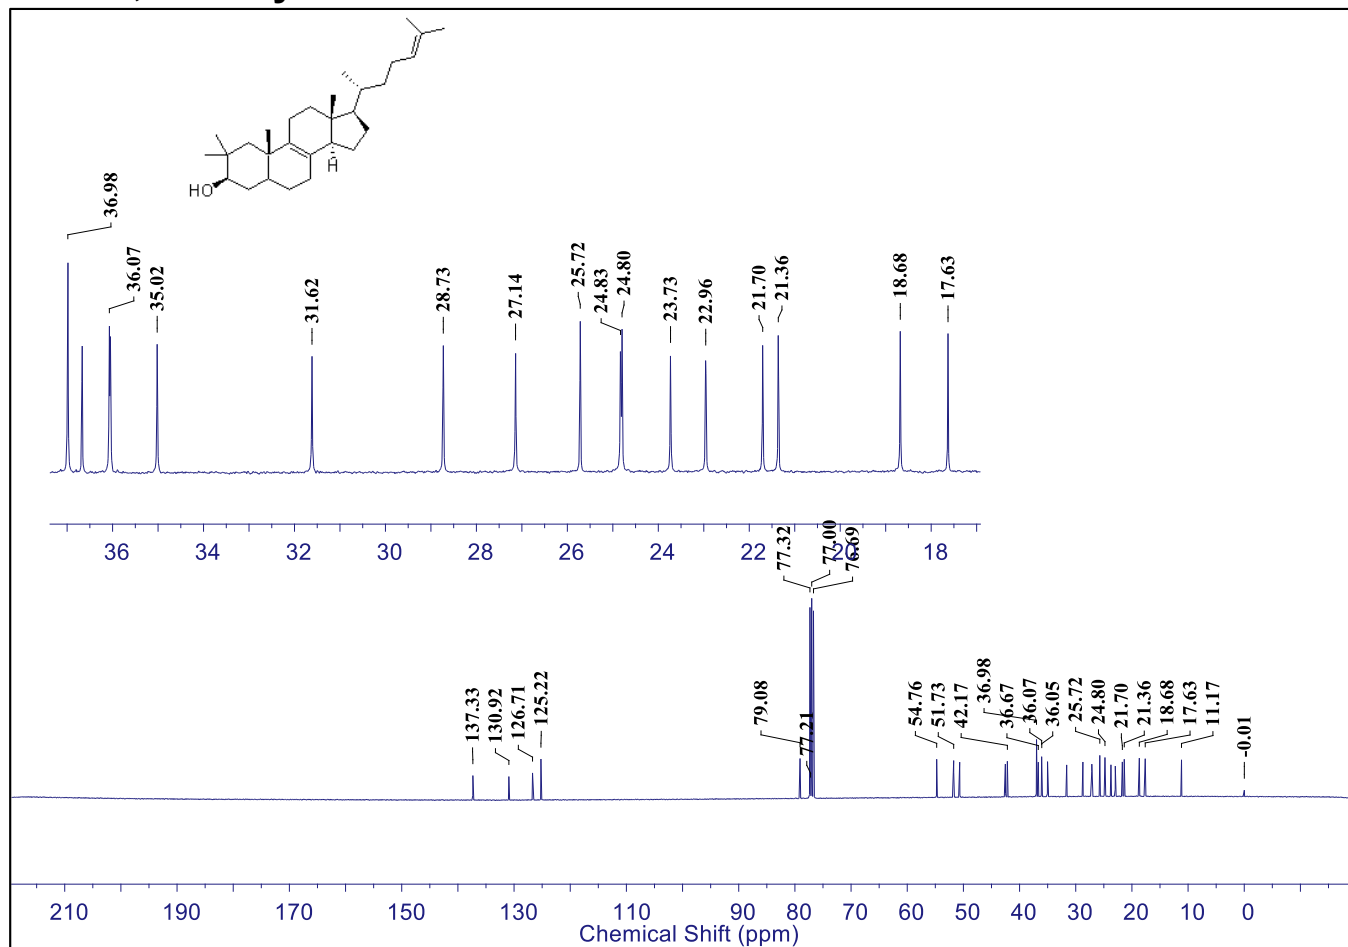



# $^1\text{H}$ - $^1\text{H}$ COSY of 2,2-Me-Zymosterol

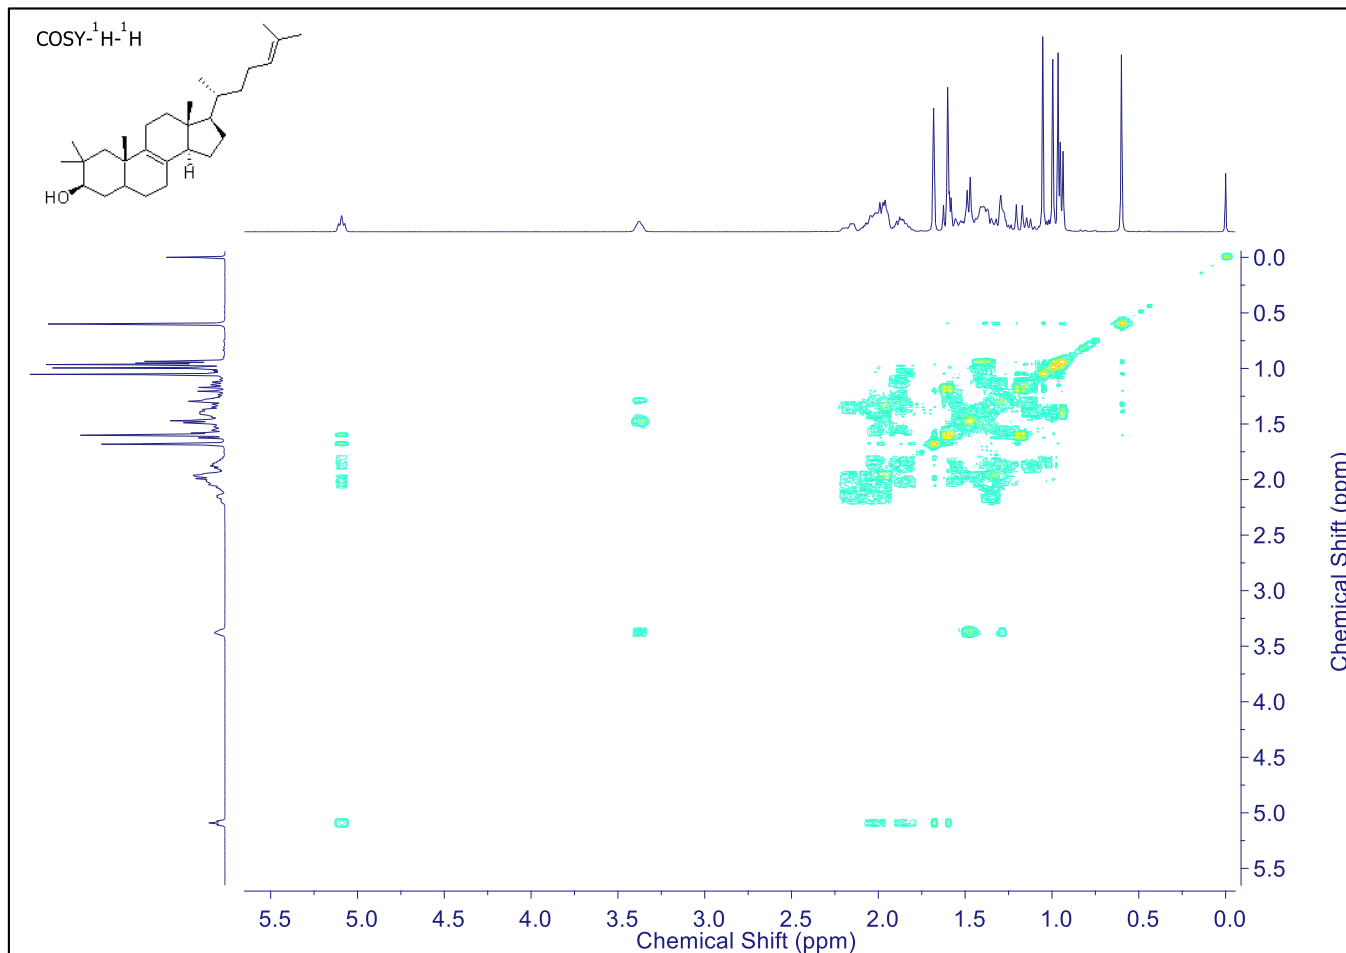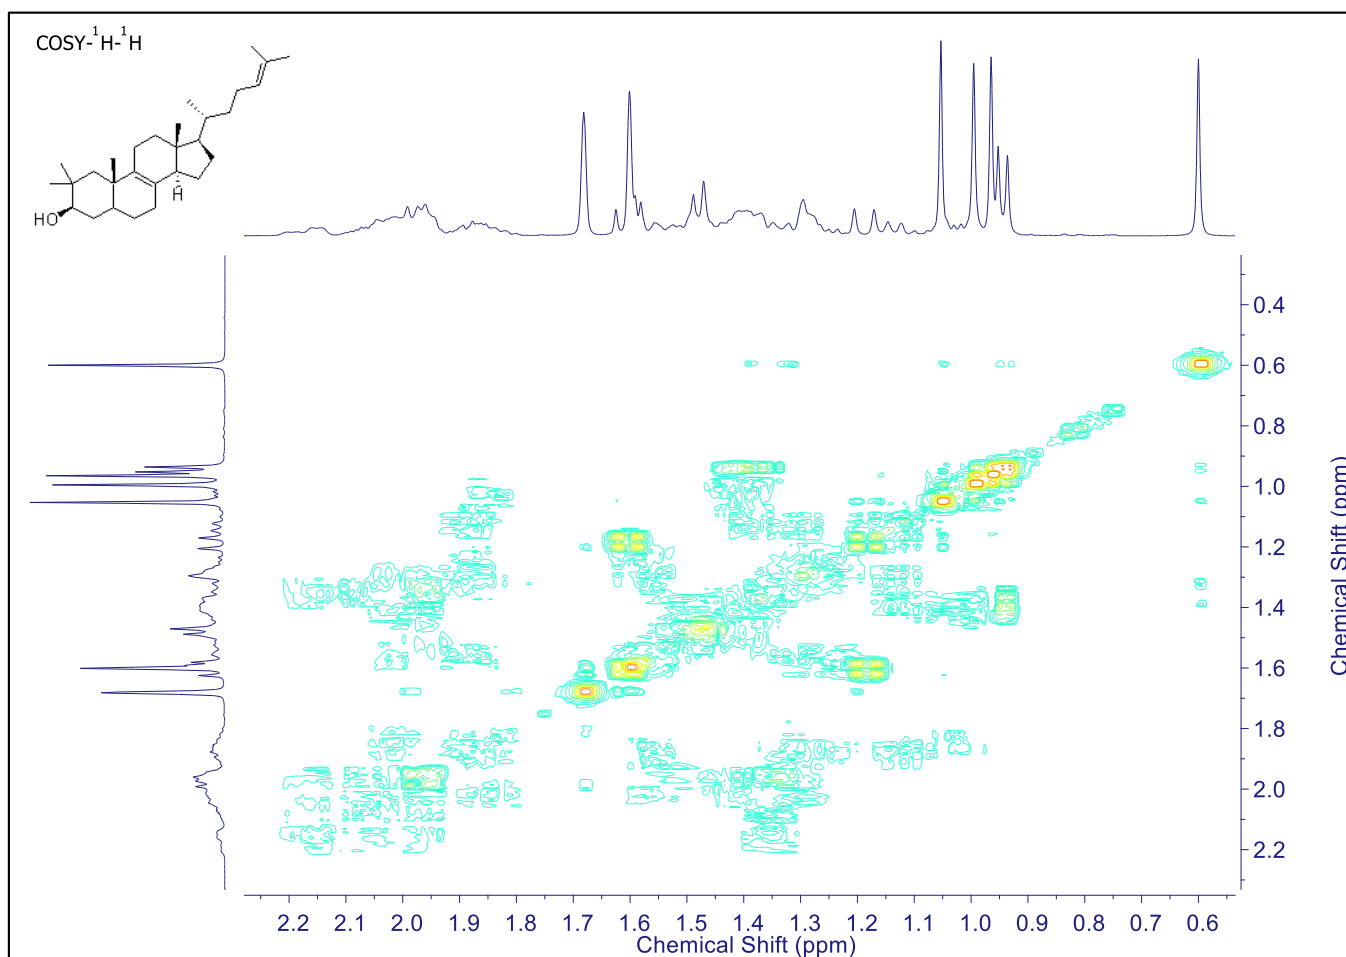

# $^1\text{H}$ - $^{13}\text{C}$ HSQC of 2,2-Me-Zymosterol

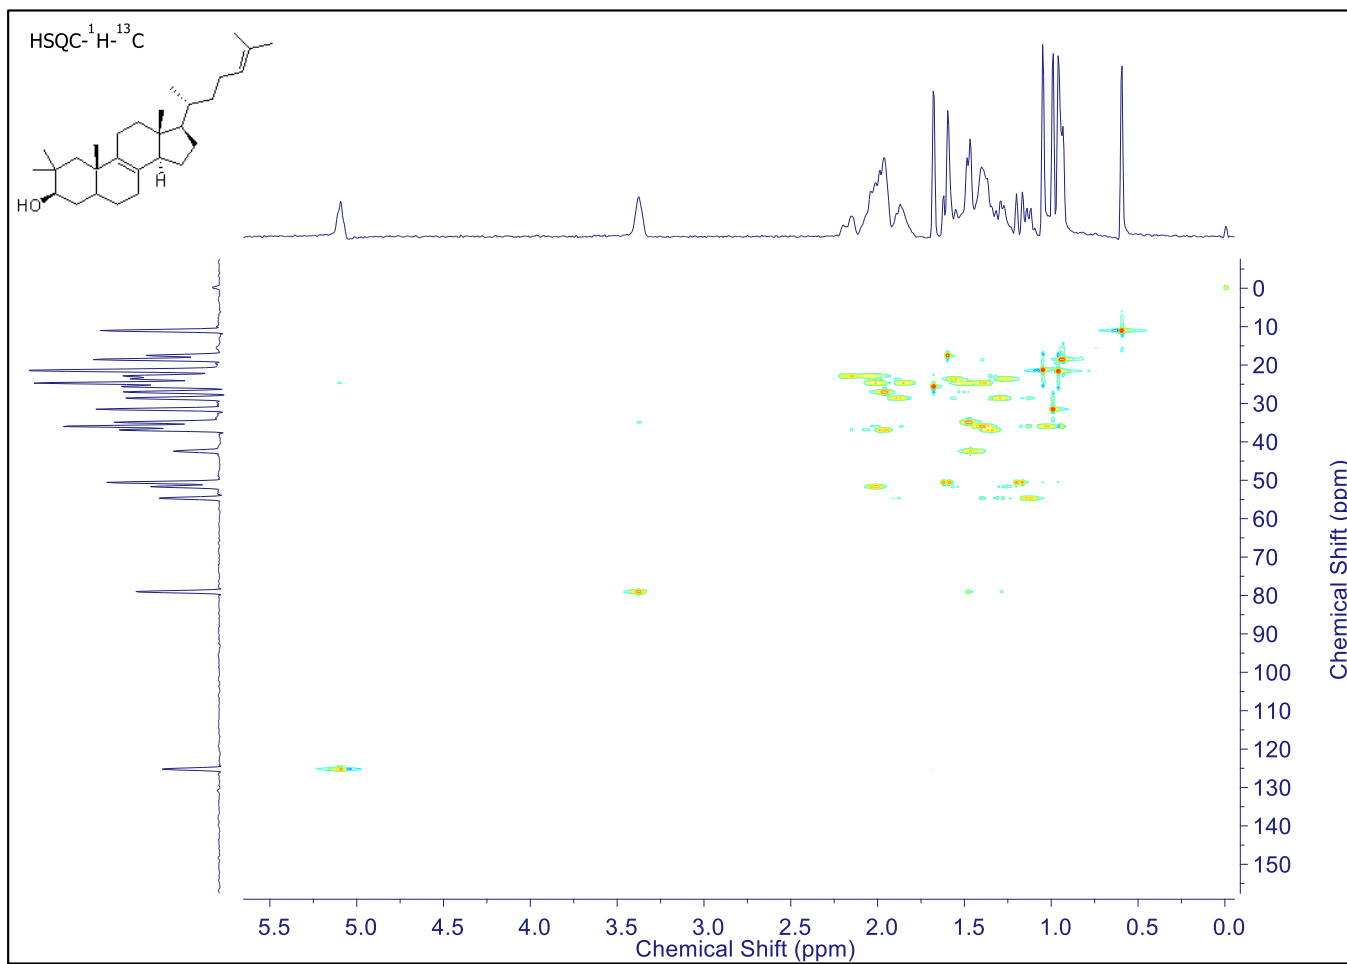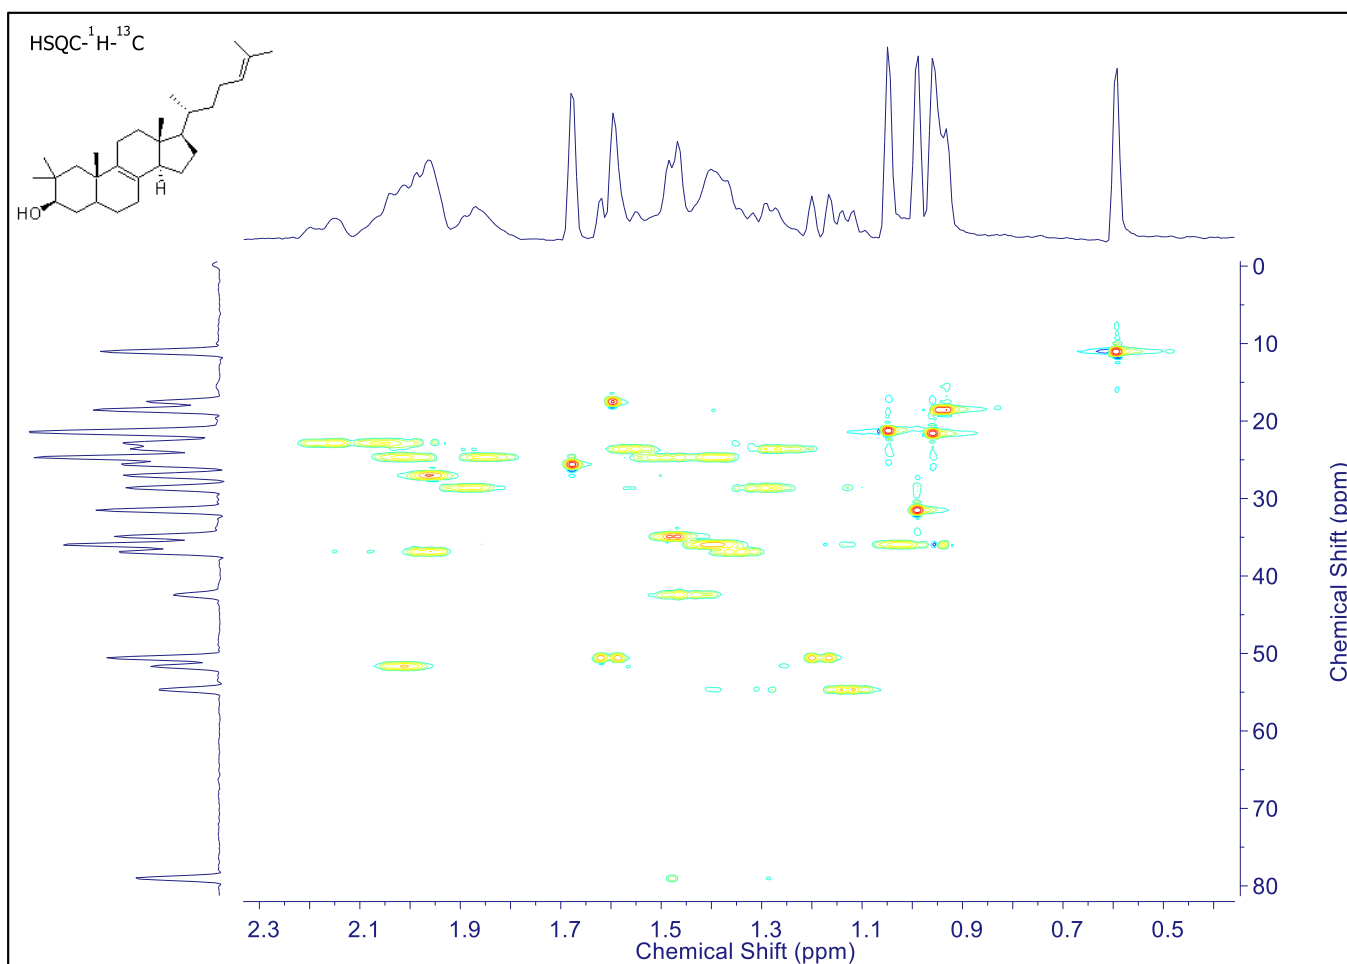

# $^1\text{H}$ - $^{13}\text{C}$ HMBC of 2,2-Me-Zymosterol

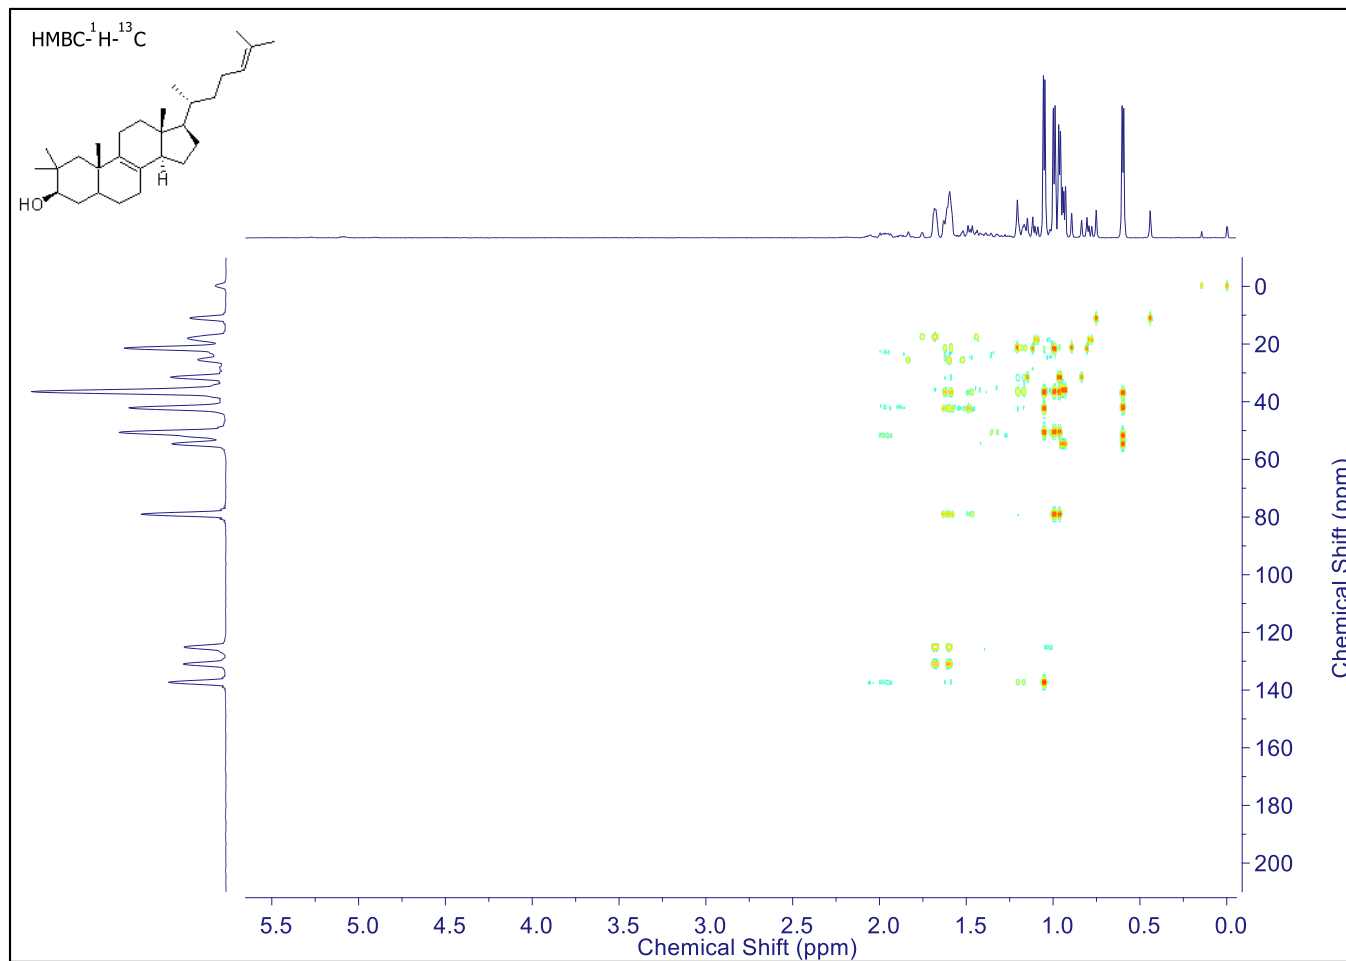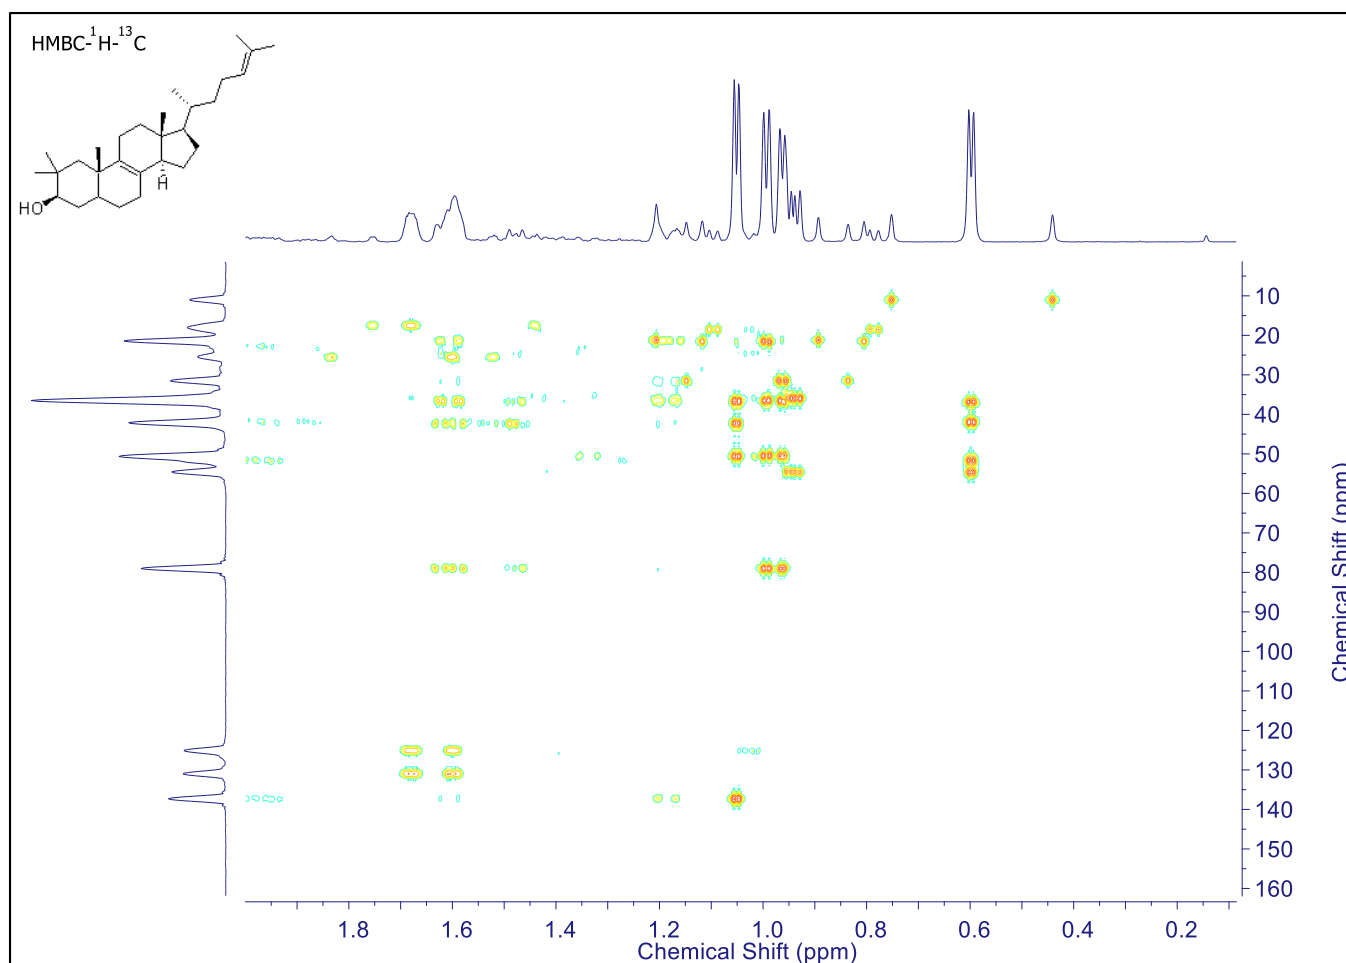

Supplement: NIHMS965312-supplement-2.pdf [file NIHMS965312-supplement-2.pdf]
